# Supplementary material for: Cognitive, biomarker, and neuroimaging indices associated with traumatic encephalopathy syndrome across two independent athlete cohorts
Source: Research Square preprint supplement (doi:10.21203/rs.3.rs-9385305/v1), 2026-04-28
Supplement: Supplementary file 1 [file b6bf91c0c68021c010b5b7ec.docx]

**Tables**

**Table 1.** Characteristics of PABHS and DIAGNOSE CTE participants included in the GWQS regression by TES status.

|  | **PABHS** (N=158) | | |  | **DIAGNOSE CTE** (N=149) | | |
| --- | --- | --- | --- | --- | --- | --- | --- |
|  | **TES-** | **TES+** | **P-value** |  | **TES-** | **TES+** | **P-value** |
| (n=94) | (n=64) | (n=55) | (n=94) |
| **Cognitive index** | | | | | | | |
| Educational attainment (years) | 13.88 | 12.27 | 0.0006 |  | 17.30 | 16.46 | 0.0053 |
| Processing speed domain score | 97.81 | 70.08 | <.0001 |  | - | - | - |
| Psychomotor speed domain score | 99.52 | 69.95 | <.0001 |  | - | - | - |
| Reaction time domain score | 93.11 | 72.61 | <.0001 |  | - | - | - |
| Verbal memory domain score | 99.62 | 81.69 | <.0001 |  | - | - | - |
| Stroop test (standardized) | 94.14 | 77.06 | 0.0002 |  | - | - | - |
| Symbol digit coding (standardized) | 96.53 | 71.77 | <.0001 |  | - | - | - |
| Executive Speed factor score | - | - | - |  | 0.31 | -0.27 | 0.0003 |
| Verbal memory factor score | - | - | - |  | 0.24 | -0.35 | 0.0001 |
| Verbal fluency factor score | - | - | - |  | 0.31 | -0.18 | 0.0045 |
| Number span factor score | - | - | - |  | -0.04 | 0.01 | 0.8103 |
| Visual memory factor score | - | - | - |  | 0.12 | 0.00 | 0.4409 |
| **Blood Biomarker index** | | | | | | | |
| ***APOE*-ε4 genetic allele*** |  |  | 0.0991 |  |  |  | 0.0020 |
| *APOE*-ε4-negative | 66 (70.21) | 45 (70.31) |  |  | 48 (87.27) | 58 (61.70) |  |
| *APOE*-ε4-positive | 28 (29.78) | 19 (29.68) |  |  | 7 (12.72) | 36 (38.30) |  |
| GFAP (pg/mL) | 83.82 | 98.49 | 0.1457 |  | 50.46 | 52.23 | 0.6768 |
| NfL (pg/mL) | 11.76 | 18.92 | 0.2958 |  | 11.47 | 11.68 | 0.8844 |
| pTau231 (pg/mL) | 18.18 | 14.70 | 0.0044 |  | 8.97 | 8.06 | 0.3363 |
| Total tau (pg/mL) | 0.88 | 0.72 | 0.4571 |  | 1.53 | 1.49 | 0.8634 |
| **Imaging index** | | | | | | | |
| Lateral ventricle (mm3) | 9613.29 | 15245.02 | <.0001 |  | 13587.38 | 14690.30 | 0.3967 |
| Inferior lateral ventricle (mm3) | 419.00 | 782.31 | <.0001 |  | 641.19 | 675.10 | 0.5386 |
| 3rd ventricle (mm3) | 1155.20 | 1644.68 | <.0001 |  | 1497.16 | 1495.47 | 0.9869 |
| 4th ventricle (mm3) | 1976.70 | 2040.36 | 0.5306 |  | 1707.59 | 1731.47 | 0.7953 |
| Thalamus (mm3) | 6825.80 | 5913.78 | <.0001 |  | 7542.31 | 7245.78 | 0.0315 |
| Caudate (mm3) | 3330.06 | 3185.60 | 0.0319 |  | 3843.48 | 3635.05 | 0.0359 |
| Hippocampus (mm3) | 4040.14 | 3612.46 | <.0001 |  | 3921.69 | 3733.13 | 0.0201 |
| Putamen (mm3) | 4800.51 | 4371.28 | <.0001 |  | 4997.20 | 4888.14 | 0.3451 |
| Amygdala (mm3) | 1710.27 | 1488.07 | <.0001 |  | 1599.48 | 1526.49 | 0.0527 |
| Pallidum (mm3) | 1911.03 | 1826.53 | 0.0208 |  | 2116.19 | 2078.20 | 0.3705 |
| Posterior corpus callosum (mm3) | 987.03 | 785.15 | <.0001 |  | 984.89 | 1005.34 | 0.4833 |
| Mid-posterior corpus callosum (mm3) | 460.39 | 353.21 | <.0001 |  | 488.27 | 469.79 | 0.3328 |
| Central corpus callosum (mm3) | 489.00 | 379.35 | <.0001 |  | 500.09 | 485.34 | 0.4367 |
| Mid-anterior corpus callosum (mm3) | 523.56 | 387.42 | <.0001 |  | 518.49 | 488.51 | 0.1272 |
| Anterior corpus callosum (mm3) | 932.20 | 783.50 | <.0001 |  | 978.63 | 957.41 | 0.4399 |
| **Covariates** | | | | | | | |
| **Age decade*** |  |  | 0.0010 |  |  |  | 0.7010 |
| 35-44 | 69 (73.40) | 28 (43.75) |  |  | - | - |  |
| 45-54 | 18 (19.15) | 19 (29.69) |  |  | 24 (43.64) | 41 (43.62) |  |
| 55-64 | 4 (4.26) | 15 (23.44) |  |  | 17 (30.91) | 34 (36.17) |  |
| 65-74 | 3 (3.19) | 2 (3.12) |  |  | 14 (25.45) | 19 (20.21) |  |
| RHI exposure | 18.96 | 41.23 | <.0001 |  | 14.56 | 16.40 | 0.0077 |
| **Biological sex*** |  |  | 0.8470 |  |  |  | - |
| Male | 80 (85.11) | 56 (87.50) |  |  | - | - |  |
| Female | 14 (14.89) | 8 (12.50) |  |  | - | - |  |
| **Race*** |  |  | 0.5452 |  |  |  | 0.4818 |
| White | 59 (62.77) | 44 (68.75) |  |  | 39 (70.91) | 60 (63.83) |  |
| Racial minority | 35 (37.23) | 20 (31.25) |  |  | 16 (29.09) | 34 (36.17) |  |
| **Athlete competition status*** |  |  | <.0001 |  |  |  | 0.3390 |
| Active (PABHS) / College (DIAGNOSE CTE) | 63 (67.02) | 14 (21.88) |  |  | 22 (40.00) | 29 (30.85) |  |
| Retired (PABHS) / Professional (DIAGNOSE CTE) | 31 (32.98) | 50 (78.12) |  |  | 33 (60.00) | 65 (69.15) |  |
| * For all categorical variables, TES- and TES+ groups report N (column percentage). All other continuous variables report the group means | | | | | | | |

**Table 2.** Odds ratios of mixture indices in the uni- and multi-index grouped weighted quantile sum models.

| **Index** | **OR*** |  | **95% CI** | |  | **p-value** |  | **AUC** | **PPV** |
| --- | --- | --- | --- | --- | --- | --- | --- | --- | --- |
| **PABHS** | | | | | | | | | |
| **Uni-Index Models** | | | | | | | | | |
| Cognitive index | 0.25 |  | 0.16 | 0.37 |  | <.0001 |  | 0.85 | 0.71 |
| Blood Biomarker index | 1.02 |  | 1.01 | 1.04 |  | 0.0045 |  | 0.62 | 0.69 |
| Imaging index | 0.30 |  | 0.20 | 0.43 |  | <.0001 |  | 0.81 | 0.78 |
| **Unadjusted Multi-Index Model** | | | | | | | | 0.87 | 0.70 |
| Cognitive index | 0.33 |  | 0.21 | 0.50 |  | <.0001 |  |  |  |
| Blood Biomarker index | 0.95 |  | 0.50 | 1.79 |  | 0.8610 |  |  |  |
| Imaging index | 0.45 |  | 0.28 | 0.72 |  | 0.0009 |  |  |  |
| **Adjusted Multi-Index Model** | | | | | | | | 0.91 | 0.80 |
| Cognitive index | 0.25 |  | 0.14 | 0.42 |  | <.0001 |  |  |  |
| Blood Biomarker index | 1.24 |  | 0.63 | 2.50 |  | 0.5396 |  |  |  |
| Imaging index | 0.35 |  | 0.17 | 0.65 |  | 0.0015 |  |  |  |
| **DIAGNOSE CTE** | | | | | | | | | |
| **Uni-Index Models** | | | | | | | | | |
| Cognitive index | 0.19 |  | 0.09 | 0.34 |  | <.0001 |  | 0.78 | 0.84 |
| Blood Biomarker index | 1.64 |  | 1.12 | 2.44 |  | 0.0130 |  | 0.62 | 0.76 |
| Imaging index | 0.62 |  | 0.40 | 0.92 |  | 0.0208 |  | 0.62 | 0.74 |
| **Unadjusted Multi-Index Model** | | | | | | | | 0.82 | 0.84 |
| Cognitive index | 0.17 |  | 0.08 | 0.31 |  | <.0001 |  |  |  |
| Blood Biomarker index | 2.07 |  | 1.32 | 3.38 |  | 0.0023 |  |  |  |
| Imaging index | 0.69 |  | 0.40 | 1.15 |  | 0.1565 |  |  |  |
| **Adjusted Multi-Index Model** | | | | | | | | 0.84 | 0.85 |
| Cognitive index | 0.15 |  | 0.07 | 0.30 |  | <.0001 |  |  |  |
| Blood Biomarker index | 2.25 |  | 1.39 | 3.83 |  | 0.0015 |  |  |  |
| Imaging index | 0.75 |  | 0.41 | 1.36 |  | 0.3500 |  |  |  |
| *ORs represent the effect of a one-unit increase in the corresponding weighted index. | | | | | | | | | |

**Table 3.** A sensitivity analysis of odds ratios of mixture indices in the uni- and multi-index grouped weighted quantile sum models (blood biomarker and imaging only)

| **Index** | **OR** |  | **95% CI** | |  | **p-value** |  | **AUC** | **PPV** |
| --- | --- | --- | --- | --- | --- | --- | --- | --- | --- |
| **PABHS** | | | | | | | | | |
| **Unadjusted Multi-Index Model** |  |  |  |  |  |  |  | 0.82 | 0.68 |
| Blood Biomarker index | 0.97 |  | 0.54 | 1.72 |  | 0.9080 |  |  |  |
| Imaging index | 0.28 |  | 0.18 | 0.42 |  | <.0001 |  |
| **Adjusted Multi-Index Model** |  |  |  |  |  |  |  | 0.88 | 0.72 |
| Blood Biomarker index | 2.06 |  | 1.06 | 4.28 |  | 0.0455 |  |  |  |
| Imaging index | 0.18 |  | 0.09 | 0.35 |  | <.0001 |  |
| **DIAGNOSE CTE** | | | | | | | | | |
| **Unadjusted Multi-Index Model** |  |  |  |  |  |  |  | 0.66 | 0.74 |
| Blood Biomarker index | 1.60 |  | 1.08 | 2.42 |  | 0.0204 |  |  |  |
| Imaging index | 0.60 |  | 0.37 | 0.94 |  | 0.0277 |  |
| **Adjusted Multi-Index Model** |  |  |  |  |  |  |  | 0.71 | 0.78 |
| Blood Biomarker index | 1.65 |  | 1.01 | 2.74 |  | 0.0486 |  |  |  |
| Imaging index | 0.48 |  | 0.26 | 0.84 |  | 0.0133 |  |
