# Supplementary material for: Cognitive, biomarker, and neuroimaging indices associated with traumatic encephalopathy syndrome across two independent athlete cohorts
Source: Research Square preprint supplement (doi:10.21203/rs.3.rs-9385305/v1), 2026-04-28
Supplement: Supplementary file 2 [file c0f5e1ee317376fb0068f69b.docx]

**Appendix**

**
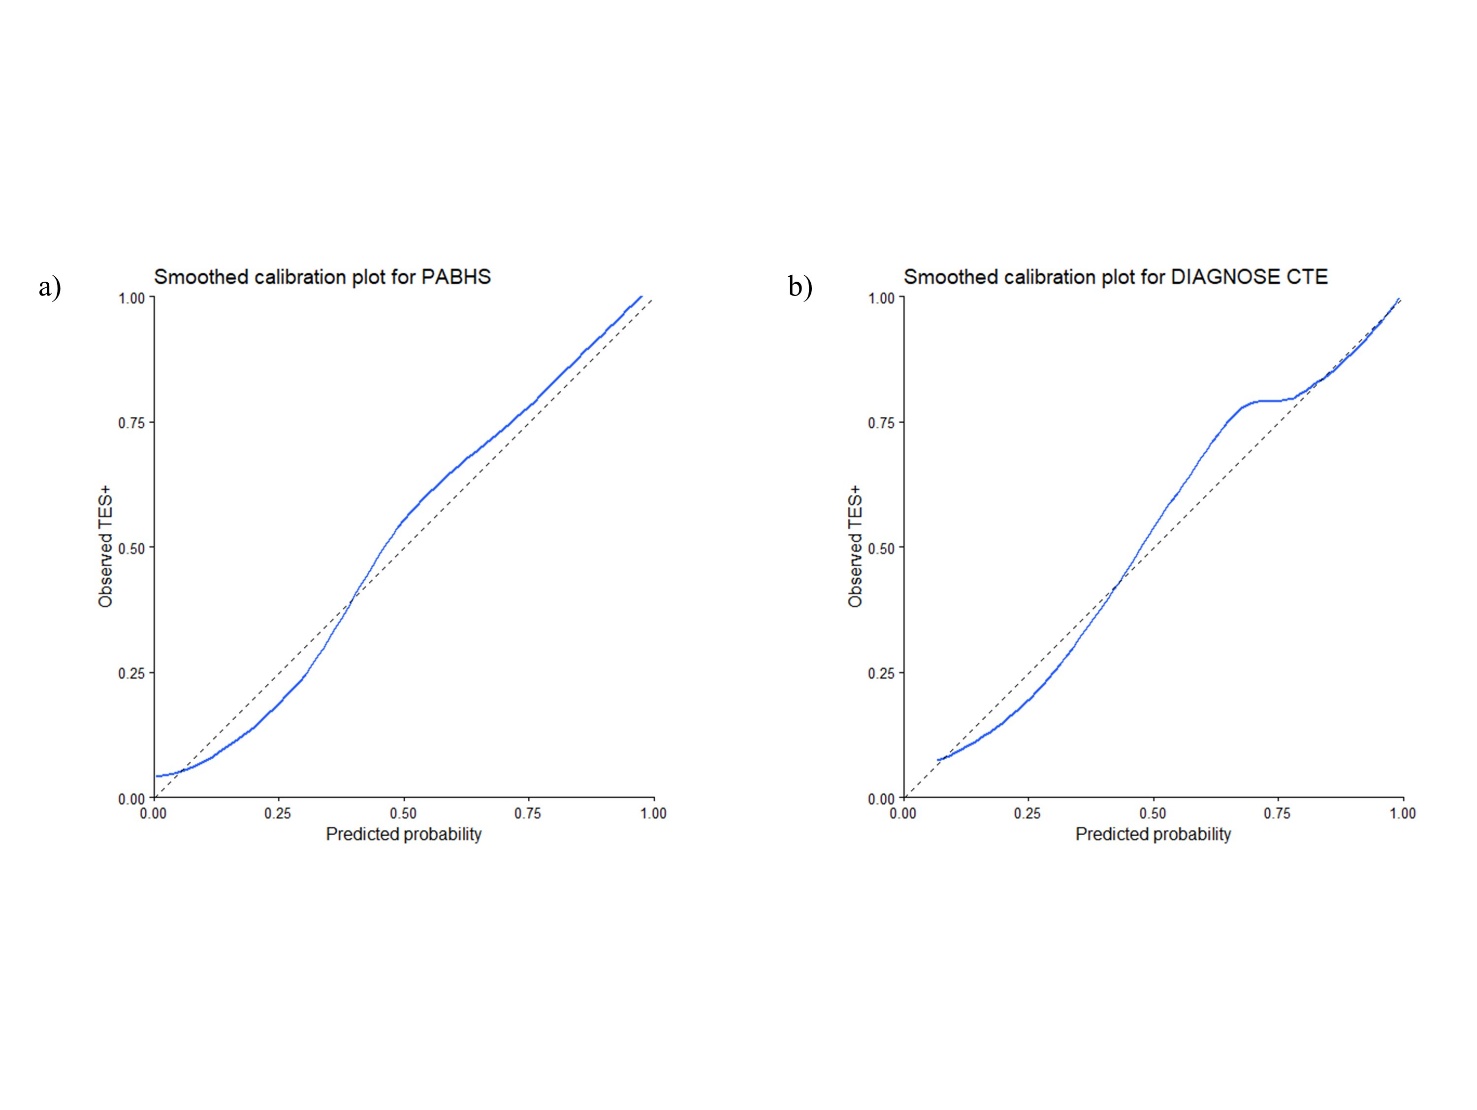
**

**Figure A1.** Smoothed Calibration Plots for a) PABHS and b) DIAGNOSE CTE.


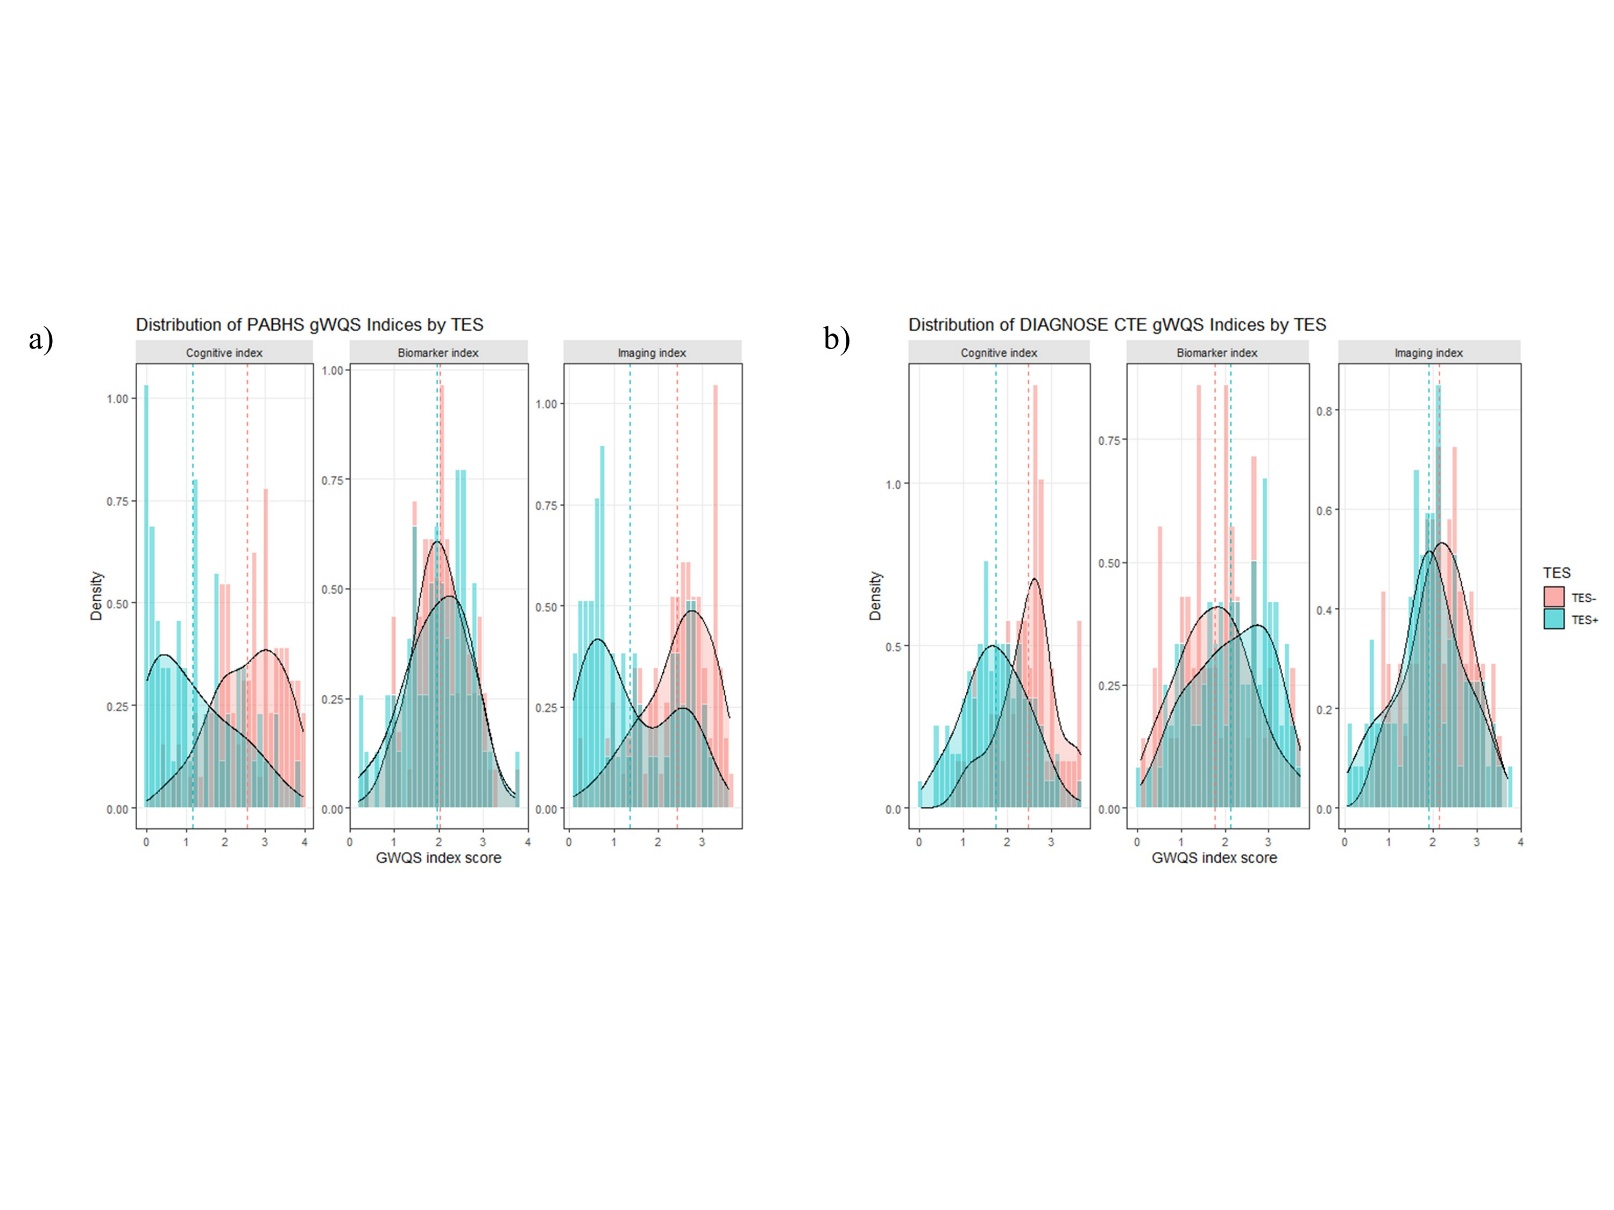


**Figure A2**. Histograms of the computed indices by TES status in the adjusted multi-index model for a) PABHS and b) DIAGNOSE CTE

**Table A3.** Summary statistics of weighted indices included in the adjusted models

| **TES Status** | **Mean** | **SD** | **Min** | **Q1** | **Median** | **Q3** | **Max** |
| --- | --- | --- | --- | --- | --- | --- | --- |
| **PABHS** | | | | | | | |
| **Positive** |  |  |  |  |  |  |  |
| Cognitive Index | 1.18 | 1.03 | 0.00 | 0.26 | 0.95 | 1.85 | 3.79 |
| Biomarker Index | 1.95 | 0.74 | 0.20 | 1.45 | 1.99 | 2.50 | 3.72 |
| Imaging Index | 1.37 | 0.97 | 0.08 | 0.56 | 1.05 | 2.32 | 3.15 |
| **Negative** |  |  |  |  |  |  |  |
| Cognitive Index | 2.56 | 0.88 | 0.41 | 1.92 | 2.71 | 3.24 | 3.95 |
| Biomarker Index | 2.03 | 0.62 | 0.36 | 1.63 | 2.03 | 2.46 | 3.72 |
| Imaging Index | 2.43 | 0.80 | 0.24 | 1.93 | 2.56 | 3.02 | 3.62 |
| **DIAGNOSE CTE** | | | | | | | |
| **Positive** |  |  |  |  |  |  |  |
| Cognitive Index | 1.73 | 0.72 | 0.03 | 1.24 | 1.74 | 2.24 | 3.67 |
| Biomarker Index | 2.14 | 0.89 | 0.06 | 1.49 | 2.19 | 2.90 | 3.73 |
| Imaging Index | 1.91 | 0.82 | 0.07 | 1.47 | 1.94 | 2.45 | 3.70 |
| **Negative** |  |  |  |  |  |  |  |
| Cognitive Index | 2.47 | 0.65 | 0.90 | 2.09 | 2.58 | 2.78 | 3.68 |
| Biomarker Index | 1.77 | 0.86 | 0.14 | 1.15 | 1.81 | 2.24 | 3.74 |
| Imaging Index | 2.15 | 0.67 | 0.67 | 1.68 | 2.22 | 2.53 | 3.50 |
